# Supplementary material for: Divergent Response of the Supply Capacity and Turnover of Inorganic Nitrogen to Pitaya Cultivation in the Subtropical Karst Region of Southwest China
Source: MDPI journal article supplement (doi:10.3390/land11060781), 2022-05-25
Supplement: s1 [file s1]

**Table S1.** Classification of soil fertility from Soil Survey Office of China (1992).

|                | <b>SOC</b>         | <b>TN</b>          | <b>TP (P<sub>2</sub>O<sub>5</sub>)</b> | <b>AP (P<sub>2</sub>O<sub>5</sub>)</b> | <b>TK (K<sub>2</sub>O)</b> | <b>AK (K<sub>2</sub>O)</b> |
|----------------|--------------------|--------------------|----------------------------------------|----------------------------------------|----------------------------|----------------------------|
|                | g kg <sup>-1</sup> | g kg <sup>-1</sup> | g kg <sup>-1</sup>                     | mg kg <sup>-1</sup>                    | g kg <sup>-1</sup>         | mg kg <sup>-1</sup>        |
| Extremely high | >23.2              | >2.0               | >2.0                                   | >40                                    | >20                        | >200                       |
| Very high      | 17.4-23.2          | 1.5-2.0            | 1.5-2.0                                | 20-40                                  | 15-20                      | 150-200                    |
| high           | 11.6-17.4          | 1-1.5              | 1-1.5                                  | 10-20                                  | 10-15                      | 100-150                    |
| Moderate       | 5.8-11.6           | 0.75-1.0           | 0.75-1.0                               | 5.0-10                                 | 5.0-10                     | 50-100                     |
| Low            | 3.4-5.8            | 0.5-0.75           | 0.5-0.75                               | 3.0-5.0                                | 3.0-5.0                    | 30-50                      |
| Very low       | <3.4               | <0.5               | <0.5                                   | <3.0                                   | <3.0                       | <30                        |

SOC, soil organic C; TN, total N; TP, total P; TK, total K; AP, Available P; AK, Available K.

Soil Survey Office of China, 1992. China Soil Survey Technique; Agricultural Press: Beijing, China. (In Chinese)
